# Supplementary material for: A Novel Near-Infrared Ytterbium Complex [Yb(DPPDA)2](DIPEA) with Φ = 0.46% and τobs = 105 μs
Source: MDPI journal article supplement (doi:10.3390/molecules28041632), 2023-02-08
Supplement: s1 [file s1]

Supporting information

# A novel near-infrared ytterbium complex [Yb(DPPDA)<sub>2</sub>](DIPEA) with $\phi = 0.46\%$ and $\tau_{\text{obs}} = 105 \mu\text{s}$

Guozhu Ren <sup>1,2</sup>, Danyang Zhang <sup>1,2</sup>, Hao Wang <sup>3</sup>, Xiaofang Li <sup>1,2</sup>, Ruiping Deng <sup>1</sup>, Shihong Zhou <sup>1</sup>, Long Tian <sup>1</sup>, Liang Zhou <sup>1,2,\*</sup>

- <sup>1</sup> State Key Laboratory of Rare Earth Resource Utilization, Changchun Institute of Applied Chemistry, Chinese Academy of Sciences, Changchun 130022, China; rgz666@ciac.ac.cn (G.R.); dyzhang26@ciac.ac.cn (D.Z.); xflizkd@ciac.ac.cn (X.L.); dengrp@ciac.ac.cn (R.D.); shzhou@ciac.ac.cn (S.Z.); tianlong@ciac.ac.cn (L.T.)
  - <sup>2</sup> School of Applied Chemistry and Engineering, University of Science and Technology of China, Hefei 230027, China
  - <sup>3</sup> School of Materials Science and Engineering, Jilin Jianzhu University, Changchun 130118, China; 13341427152@163.com
- \* Correspondence: zhou@ciac.ac.cn; Tel.: +86-431-85262855; Fax: +86-431-85698041

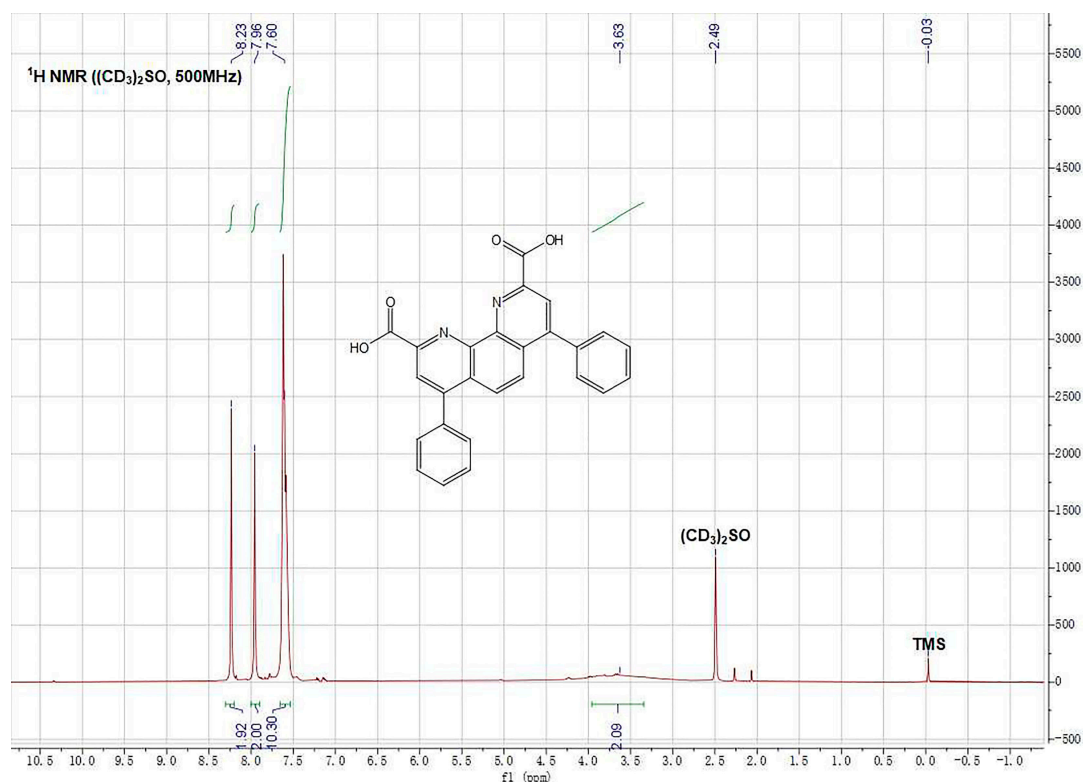

**Figure S1.** <sup>1</sup>H NMR spectrum of 4,7-diphenyl-1,10-phenanthroline-2,9-dicarboxylic acid (DPPDA).

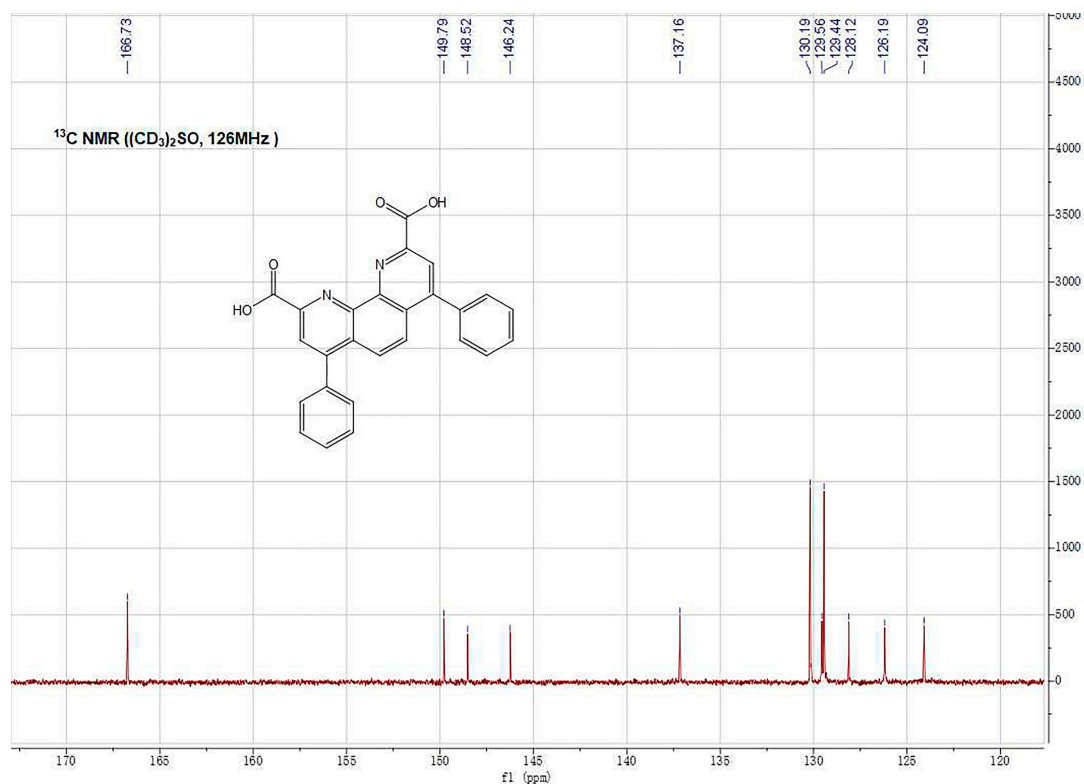

**Figure S2.** <sup>13</sup>C NMR spectrum of DPPDA.

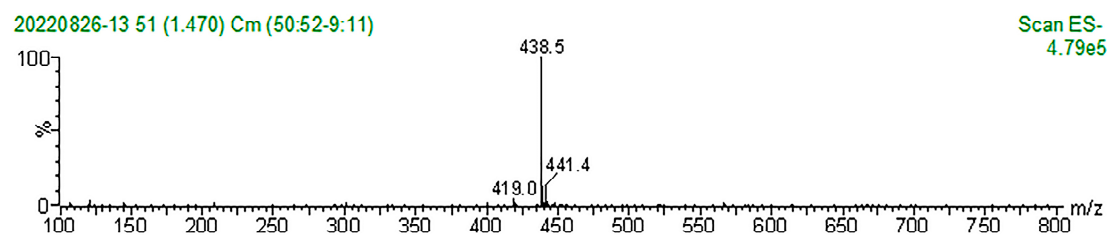

**Figure S3.** ESI-MS spectrum of DPPDA (CH<sub>3</sub>CH<sub>2</sub>OH negative mode).

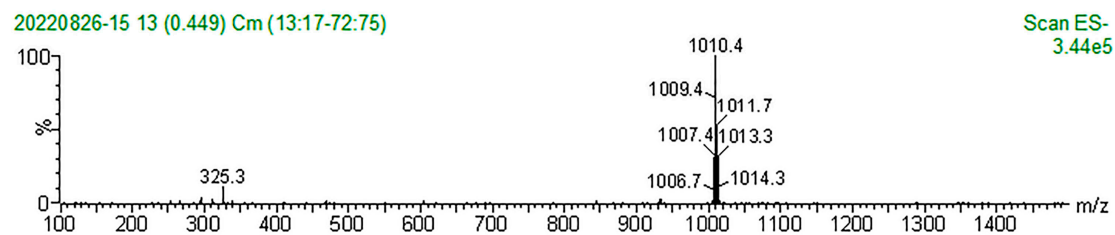

**Figure S4.** ESI-MS spectrum of [Yb(DPPDA)<sub>2</sub>](DIPEA) (CHCl<sub>3</sub> negative mode).

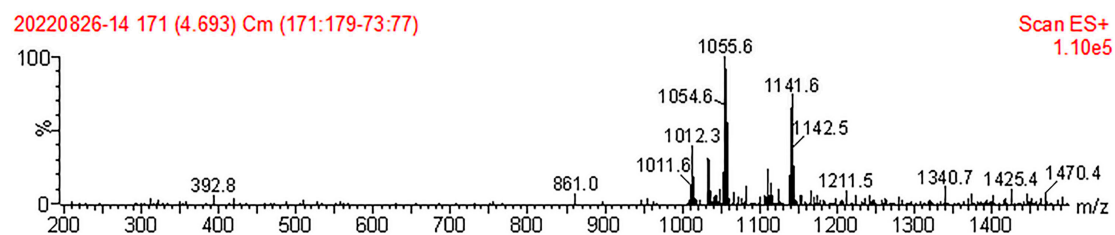

**Figure S5.** ESI-MS spectrum of  $[\text{Yb}(\text{DPPDA})_2](\text{DIPEA})$  ( $\text{CHCl}_3$  positive mode).

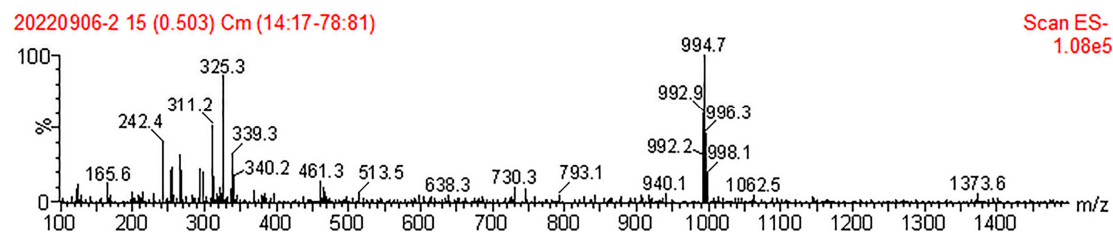

**Figure S6.** ESI-MS spectrum of  $[\text{Gd}(\text{DPPDA})_2](\text{DIPEA})$  ( $\text{CHCl}_3$  negative mode).

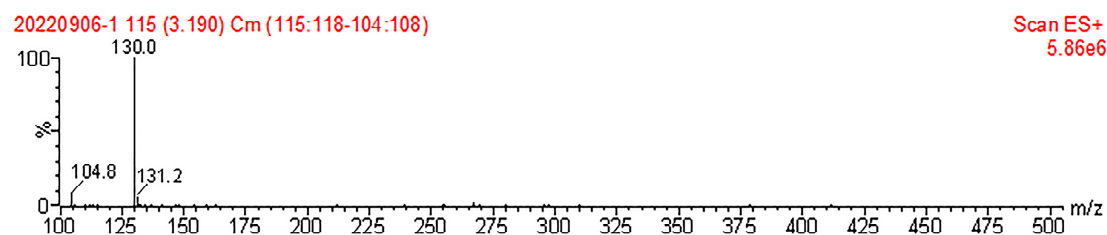

**Figure S7.** ESI-MS spectrum of  $[\text{Gd}(\text{DPPDA})_2](\text{DIPEA})$  ( $\text{CHCl}_3$  positive mode).

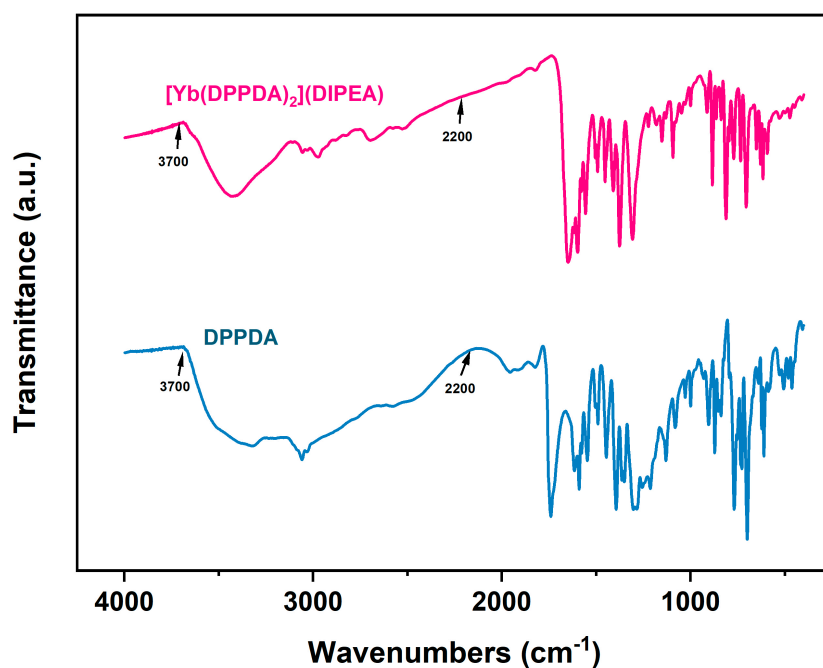

**Figure S8.** FT-IR spectra of DPPDA and  $[\text{Yb}(\text{DPPDA})_2](\text{DIPEA})$  in the range of  $4000\sim 400\text{ cm}^{-1}$ .

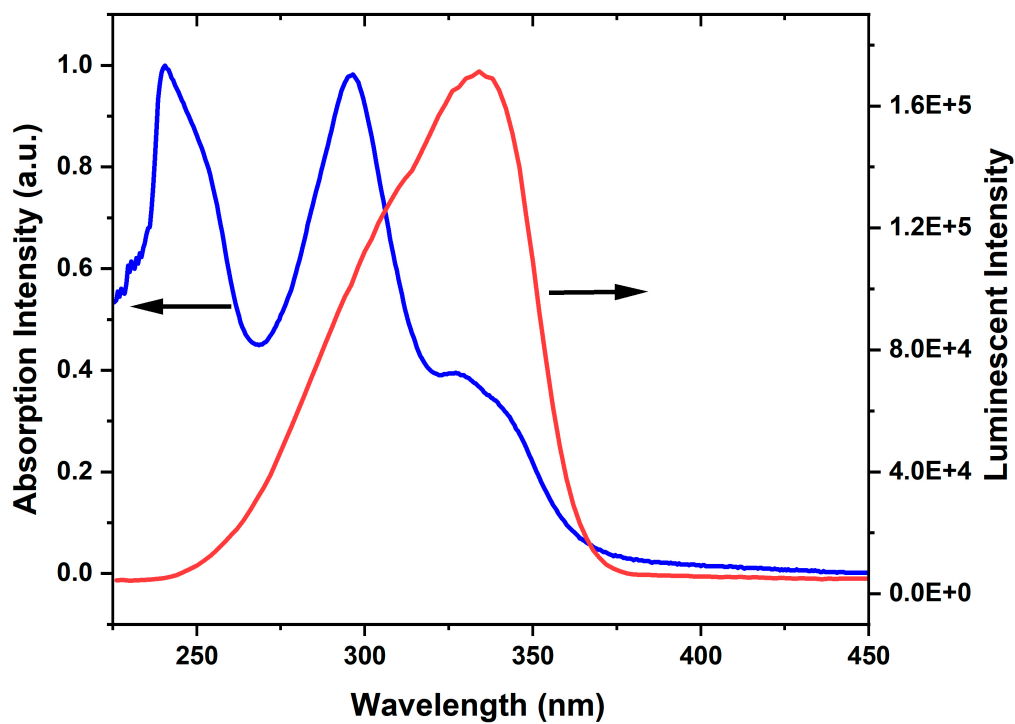

**Figure S9.** UV-Vis absorption spectrum and excitation spectrum ( $\lambda_{\text{monitor}} = 1011 \text{ nm}$ ) of  $[\text{Yb}(\text{DPPDA})_2](\text{DIPEA})$  at room temperature.

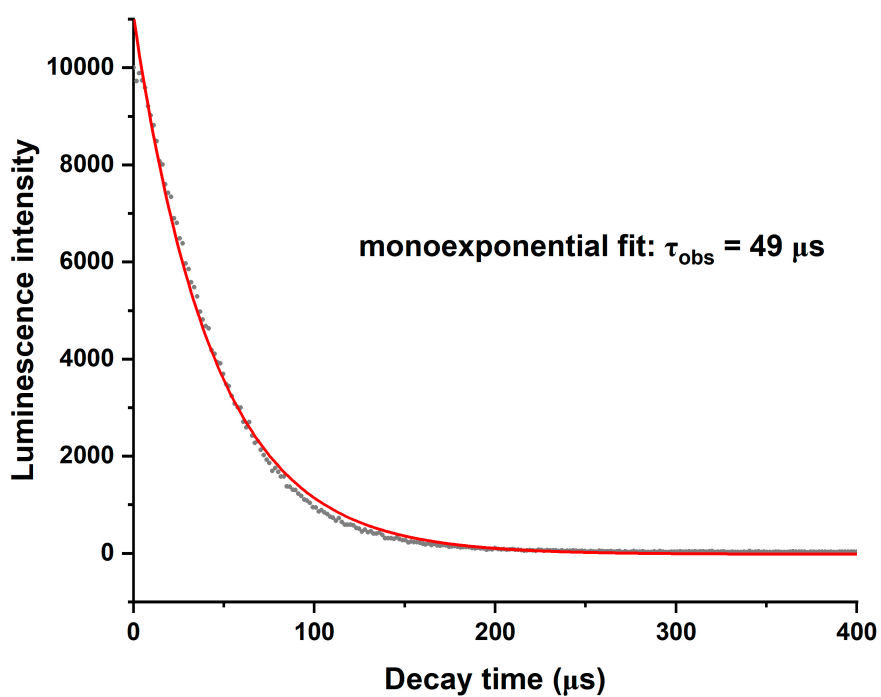



**Figure S10.** Luminescence decay profile of the transition  $^2F_{5/2} \rightarrow ^2F_{7/2}$  ( $\lambda_{em} = 1011$  nm) in  $[Yb(DPPDA)_2](DIPEA)$  ( $CHCl_3$ ,  $\lambda_{ex} = 335$  nm, monoexponential fit in red) at room temperature.

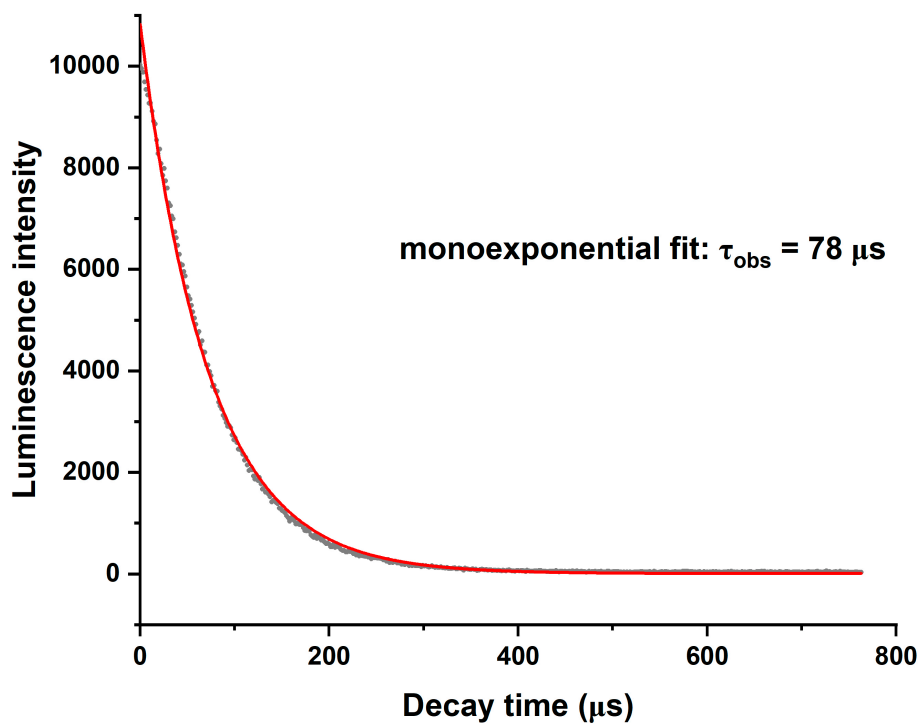

**Figure S11.** Luminescence decay profile of the transition  $^2F_{5/2} \rightarrow ^2F_{7/2}$  ( $\lambda_{em} = 1011$  nm) in  $[Yb(DPPDA)_2](DIPEA)$  ( $CDCl_3$ ,  $\lambda_{ex} = 335$  nm, monoexponential fit in red) at room temperature.

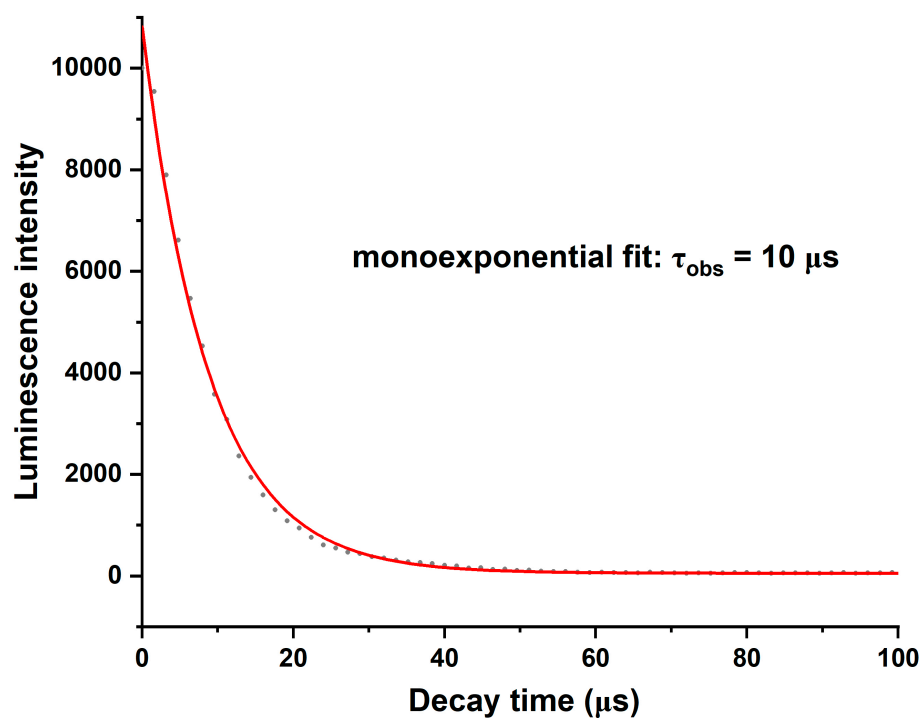

**Figure S12.** Luminescence decay profile of the transition  $^2F_{5/2} \rightarrow ^2F_{7/2}$  ( $\lambda_{\text{em}} = 1011 \text{ nm}$ ) in  $[\text{Yb}(\text{DPPDA})_2](\text{DIPEA})$  ( $\text{CH}_3\text{OH}$ ,  $\lambda_{\text{ex}} = 335 \text{ nm}$ , monoexponential fit in red) at room temperature.

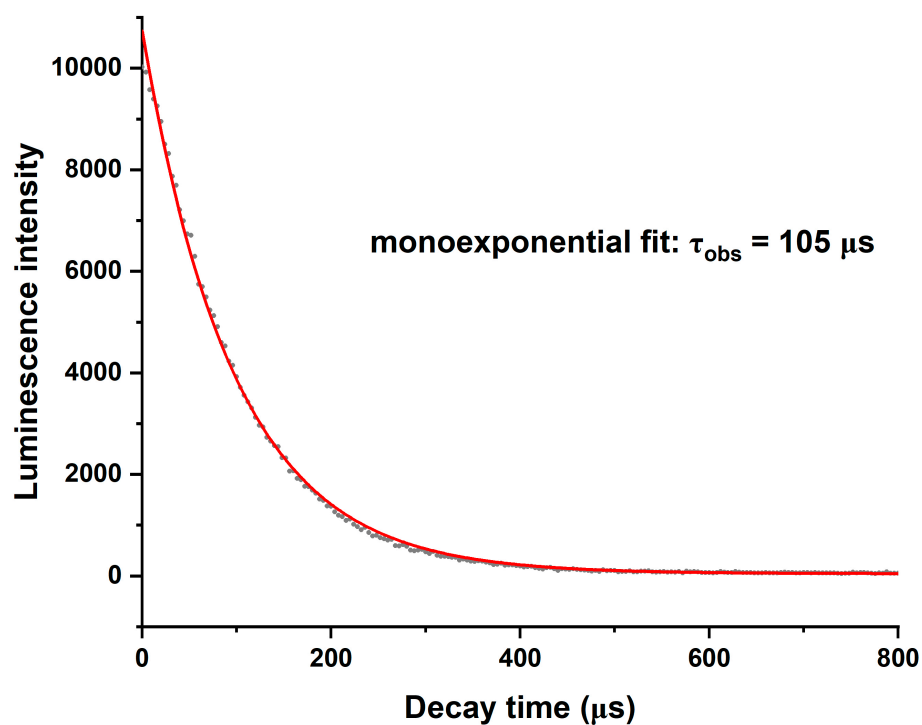

**Figure S13.** Luminescence decay profile of the transition  $^2F_{5/2} \rightarrow ^2F_{7/2}$  ( $\lambda_{\text{em}} = 1011 \text{ nm}$ ) in  $[\text{Yb}(\text{DPPDA})_2](\text{DIPEA})$  ( $\text{CD}_3\text{OD}$ ,  $\lambda_{\text{ex}} = 335 \text{ nm}$ , monoexponential fit in red) at room temperature.

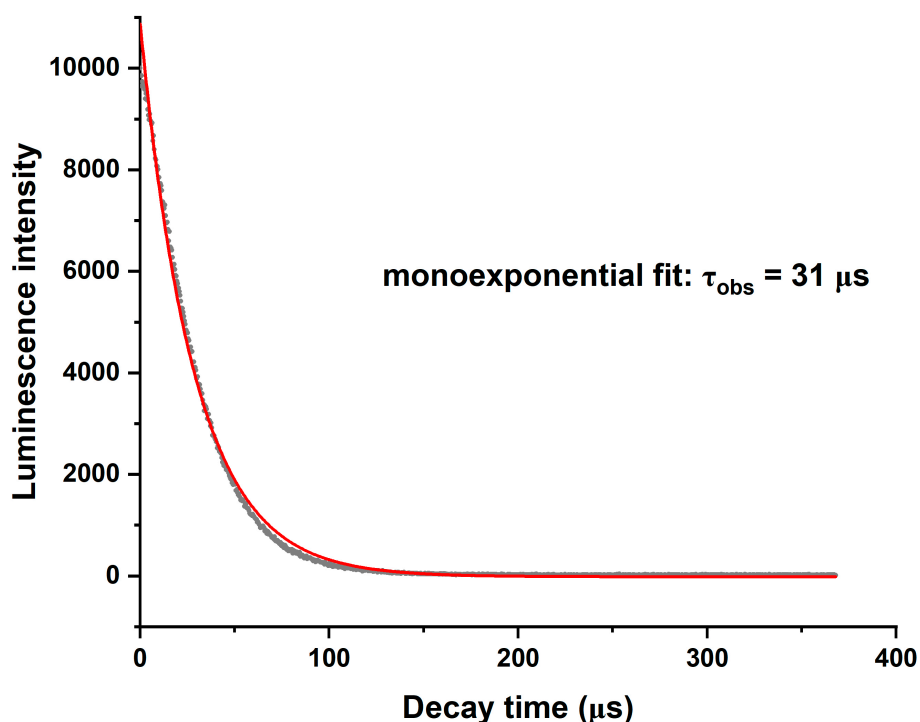

**Figure S14.** Luminescence decay profile of the transition  $^2F_{5/2} \rightarrow ^2F_{7/2}$  ( $\lambda_{em} = 1011$  nm) in  $[Yb(DPPDA)_2](DIPEA)$  (solid,  $\lambda_{ex} = 335$  nm, monoexponential fit in red) at room temperature.

| Solvent <sup>1</sup> | $S_R^2$  | $S_S^3$  | $E_S^4$  | QYs <sup>5</sup> (%) |
|----------------------|----------|----------|----------|----------------------|
| solid                | 9.26E+08 | 8.10E+07 | 1.31E+05 | 0.06                 |
| CH <sub>3</sub> OH   | 1.04E+09 | 3.18E+07 | 3.98E+04 | 0.02                 |
| CD <sub>3</sub> OD   | 4.95E+08 | 1.56E+07 | 5.58E+05 | 0.46                 |
| CHCl <sub>3</sub>    | 4.89E+08 | 1.66E+07 | 2.69E+05 | 0.22                 |
| CDCl <sub>3</sub>    | 4.31E+08 | 2.63E+07 | 3.87E+05 | 0.37                 |

<sup>1</sup>Measuring condition:  $\lambda_{ex} = 335$  nm,  $\lambda_{em} = 1011$  nm,  $1 \times 10^{-4}$  mol/L, 298 K. <sup>2</sup> $S_R$  = Integrated scattering intensity of reference cell. <sup>3</sup> $S_S$  = Integrated scattering intensity of sample. <sup>4</sup> $E_S$  = Integrated emission intensity of sample. <sup>5</sup>The calculation formula of QYs is:  $(F \cdot E_S) / (S_R - S_S)$ , F is correction factor aimed to eliminate the influence of different sensitivity between UV-Vis detector (180 nm—900 nm) and NIR detector (600 nm—1700 nm). By measuring and contrasting detected light intensity of the spectral overlapping region (700 nm—800 nm) of two detectors, F is calculated to be 3.91.

**Table S1.** The measuring data of absolute quantum yields of  $[Yb(DPPDA)_2](DIPEA)$  in different solutions and solid state at room temperature.

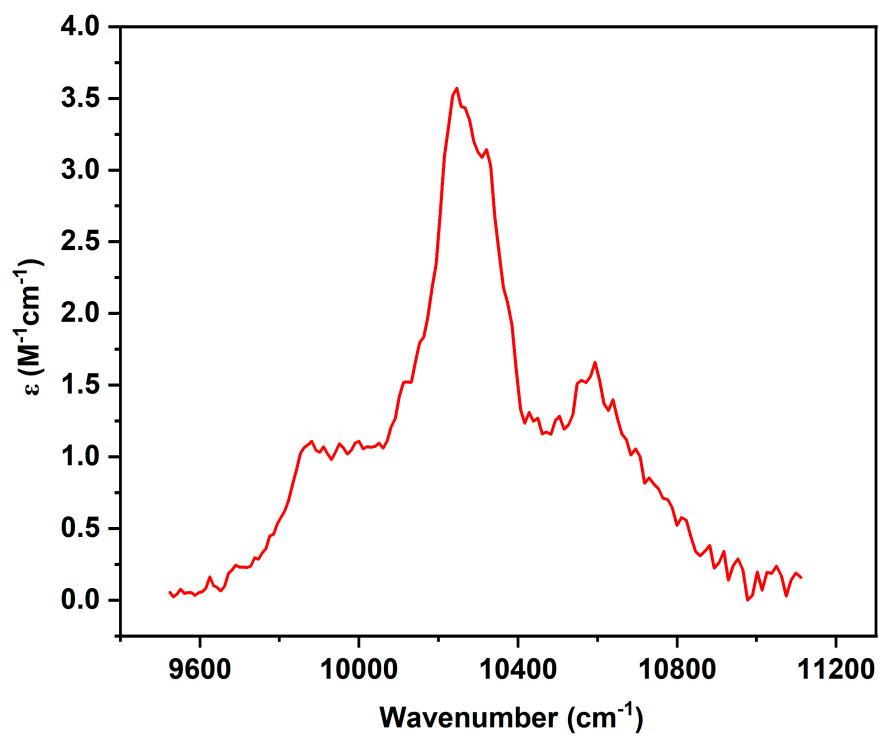

**Figure S15.** NIR absorption spectrum of the f-f transition  ${}^2F_{7/2} \rightarrow {}^2F_{5/2}$  in  $[Yb(DPPDA)_2](DIPEA)$  (in  $4 \times 10^{-4}$  mol/L  $CD_3OD$  solution).

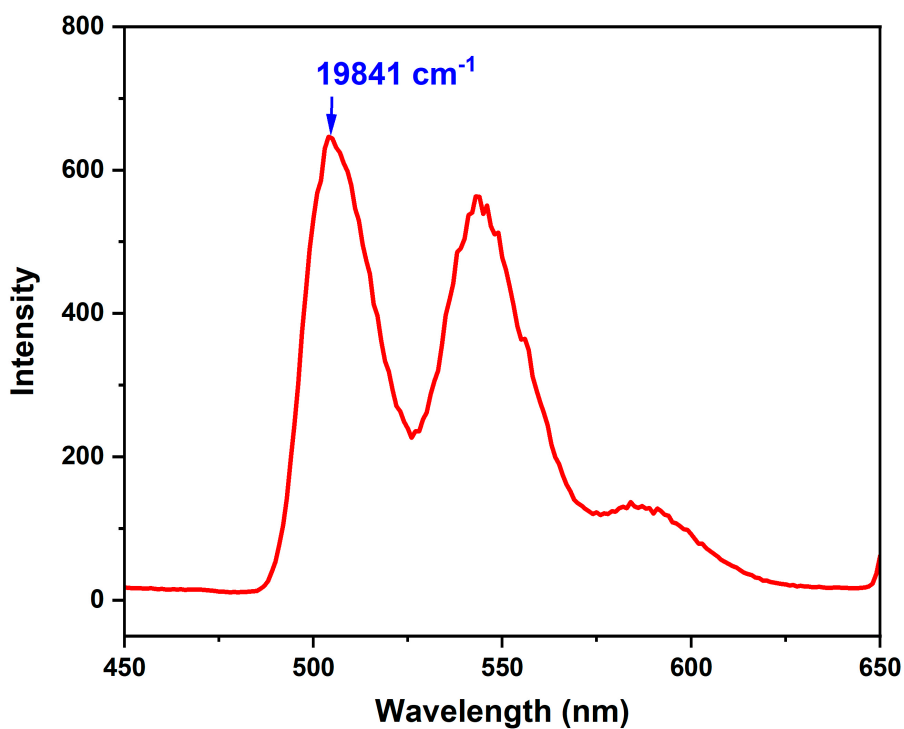

**Figure S16.** Low temperature fluorescence spectrum of [Gd(DPPDA)<sub>2</sub>](DIPEA) ( $\lambda_{\text{ex}} = 335$  nm, in  $1 \times 10^{-4}$  mol/L CHCl<sub>3</sub> solution).

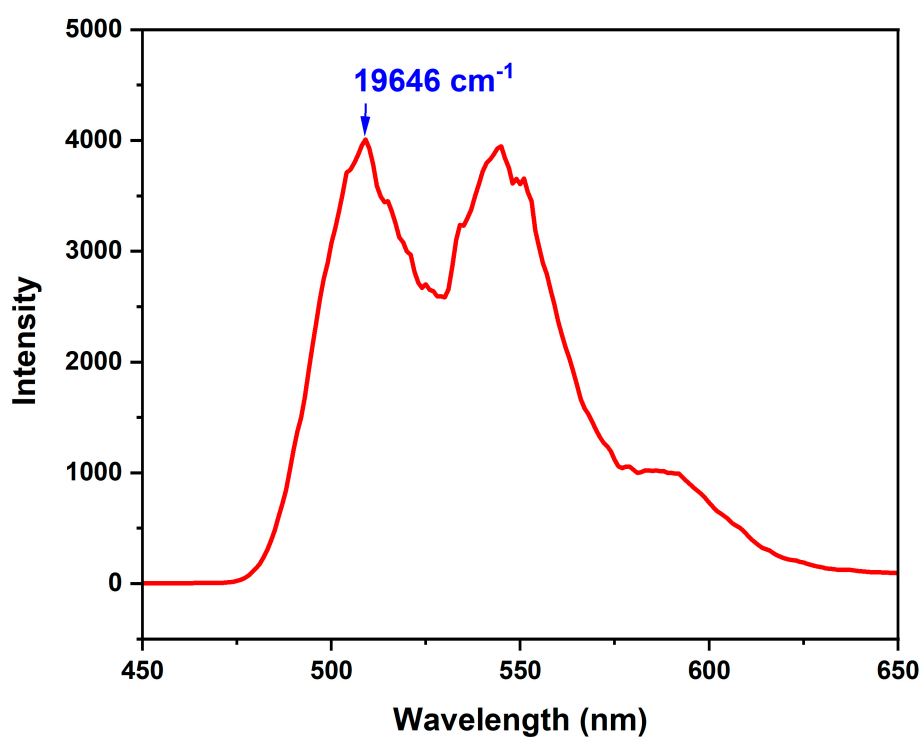

**Figure S17.** Low temperature phosphorescence spectrum of  $[\text{Gd}(\text{DPPDA})_2](\text{DIPEA})$  ( $\lambda_{\text{ex}} = 335 \text{ nm}$ , in  $1 \times 10^{-4} \text{ mol/L CHCl}_3$  solution).

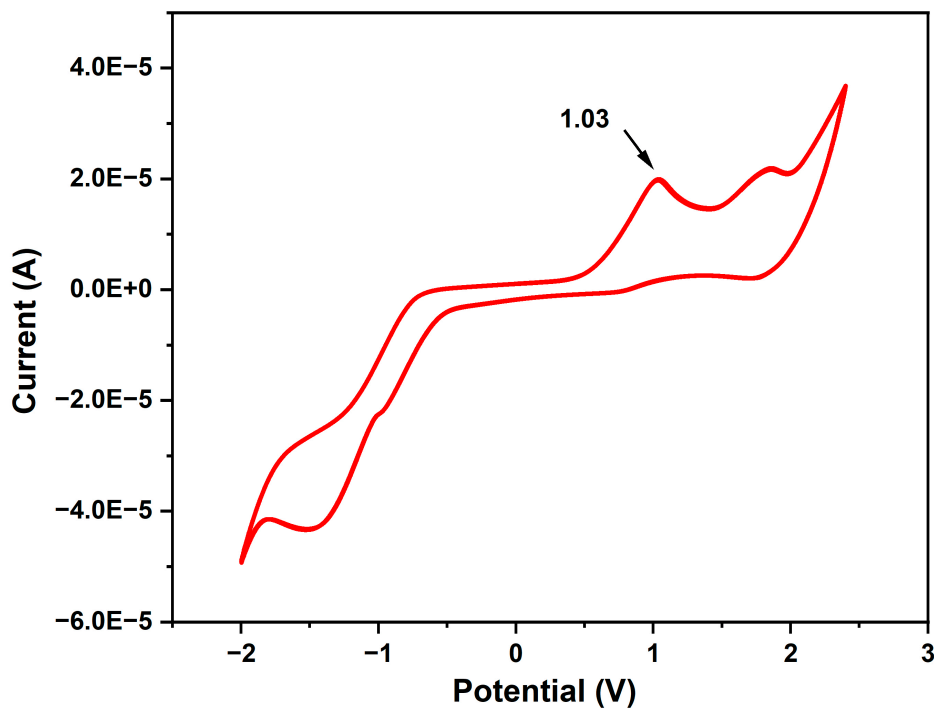

**Figure S18.** Cyclic voltammogram of  $\text{DPPDA}(\text{DIPEA})_2$  (with  $\text{Ag}/\text{AgCl}$  reference electrode in  $1 \times 10^{-3} \text{ mol/L CHCl}_3$  solution).

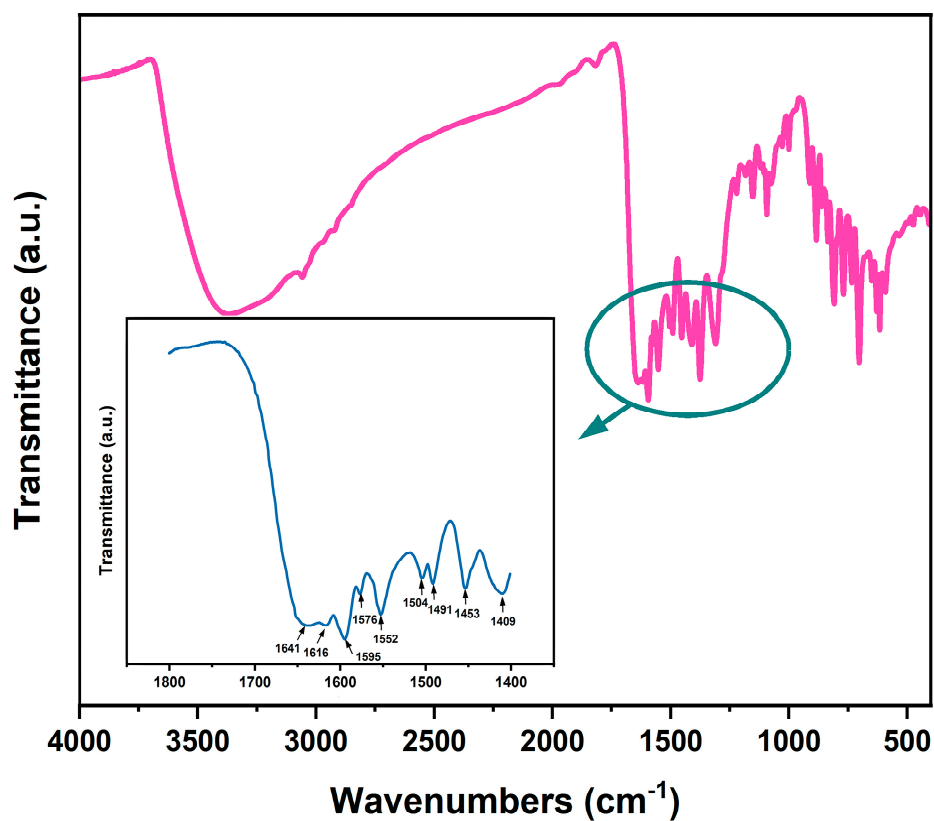

**Figure S19.** FT-IR spectrum of [Gd(DPPDA)<sub>2</sub>](DIPEA) in the range of 4000~400 cm<sup>-1</sup> (The illustration is enlarged FT-IR spectrum in the range of 1800~1400 cm<sup>-1</sup>).
